# Supplementary material for: ASIC1a affects hypothalamic signaling and regulates the daily rhythm of body temperature in mice
Source: Springer Nature journal article supplement (doi:10.1038/s42003-023-05221-2), 2023-08-17
Supplement: MOESM2 [file 42003_2023_5221_MOESM2_ESM.pdf › 42003_2023_5221_MOESM2_ESM.pdf]

Supplementary Information

**ASIC1a affects hypothalamic signaling and regulates the daily rhythm of body temperature in mice**

Zhong Peng, Panos G. Ziros, Tomaz Martini, Xiao-Hui Liao, Ron Stoop, Samuel Refetoff,  
Urs Albrecht, Gerasimos P. Sykiotis, and Stephan Kellenberger

Correspondence: Stephan Kellenberger (stephan.kellenberger@unil.ch)

This PDF file includes:

- Supplementary Figures 1 to 6
- Supplementary Table 1

An additional supplementary information file in this study includes the following:

- Supplementary Data 1: Raw data of graphs and charts

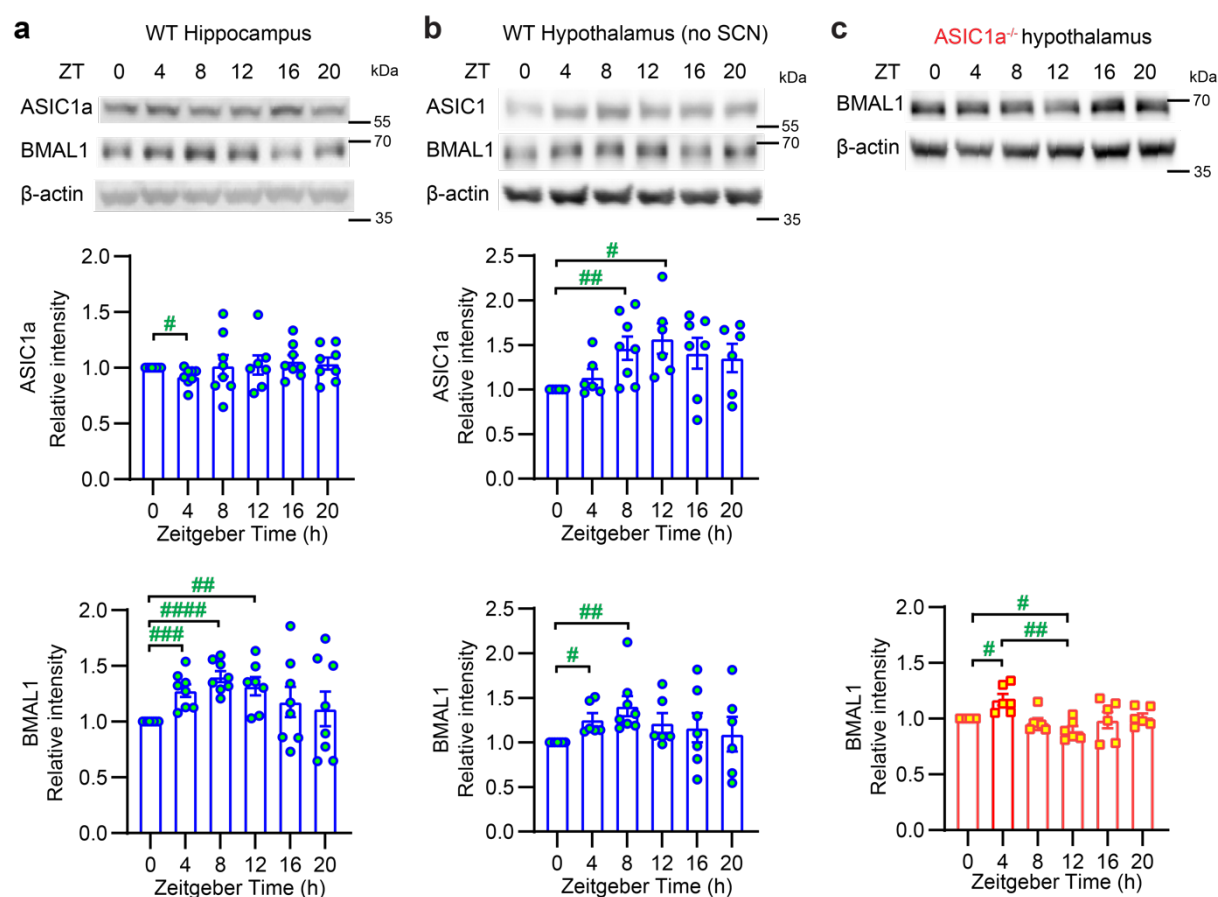

**Supplementary Figure 1. Daily expression pattern of ASIC1a and BMAL1 in the hippocampus and in the hypothalamus without SCN.** Representative Western blots and quantitative analysis of ASIC1a, BMAL1 and  $\beta$ -actin expression at the indicated ZT in WT hippocampus (a), WT hypothalamus without SCN (b) and of BMAL1 in ASIC1a<sup>-/-</sup> hypothalamus (c).  $\beta$ -actin was used as a loading control. For the quantification of ASIC1a and BMAL1 expression, the intensity of each protein band is normalized to the corresponding band at ZT0 in each independent experiment,  $n=6-8$  animals per condition. #,  $p<0.05$ ; ##,  $p<0.01$ ; ###,  $p<0.001$ ; ####,  $p<0.0001$  compared with each other by one-way ANOVA test and Dunnett's *post-hoc* test or with the ZT0 condition by one-sample t-test, done with log2-transformed data. Error bars indicate SEM.

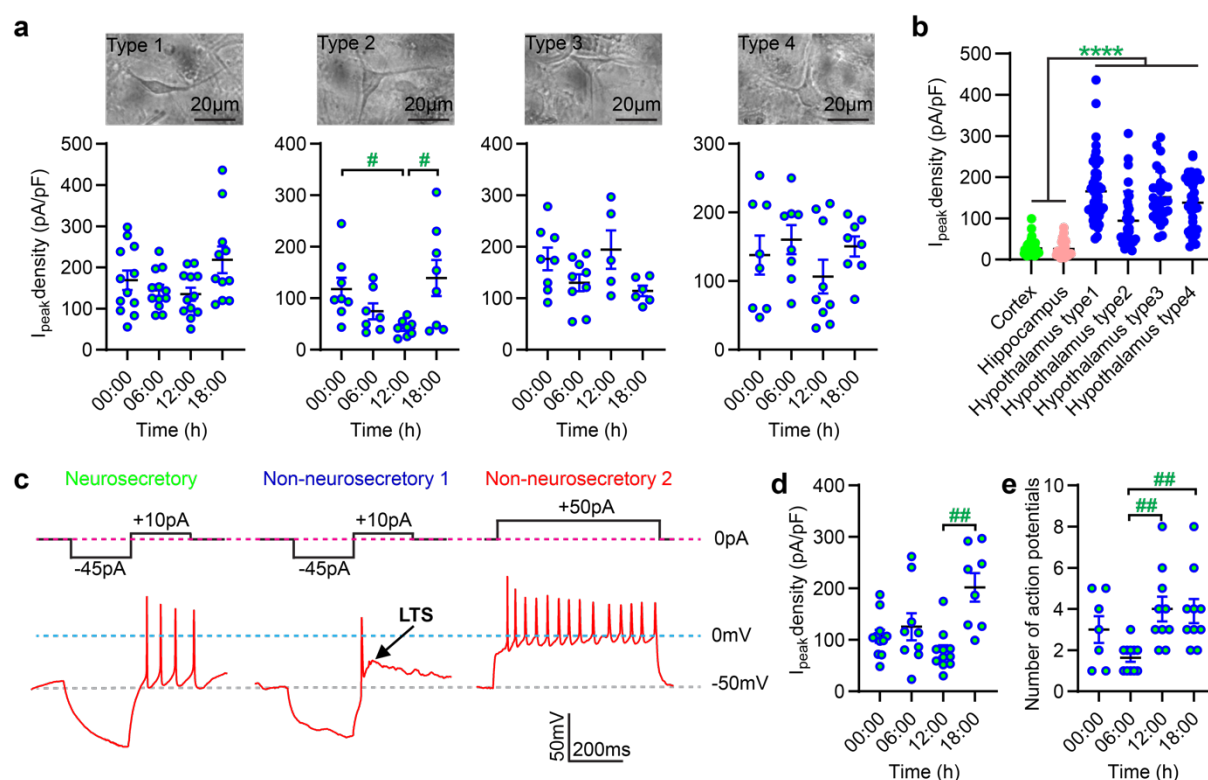

**Supplementary Figure 2. Daily rhythm of ASIC currents in cultured hypothalamus neurons.** ASIC activity from cultured hypothalamus neurons or as indicated, measured as current density by whole-cell patch-clamp at -60 mV (**a**, **b**, **d**) or measured as change in membrane potential (**c**) or number of action potentials (APs, **e**) from current-clamp experiments. Note that these neurons were not synchronized, and the time is indicated as time, not *Zeitgeber* time. **a** Representative images of four typical morphology-based types of cultured hypothalamus neurons at day 12, and peak current densities of pH6.6-induced current at the indicated time are indicated for each of the four types of hypothalamus neurons,  $n=5-12$  cells per condition. **b** Peak current densities of pH6.6-induced current in cultured mouse brain neurons, as indicated, over one diurnal cycle,  $n=26-43$  cells per condition. **c** Electrogenic properties of cultured hypothalamus neurons to classify them into neurosecretory and non-neurosecretory neurons<sup>15, 16</sup>. The protocols shown in the left and center panels were applied first. The neuron responded with APs only (neurosecretory) or with low-threshold spike (LTS, non-neurosecretory 1). If these two protocols did not induce APs, the current protocol shown on the right was applied. If a burst of APs was induced, the neuron was classified as "non-neurosecretory 2", and if not as "others", as reported in Fig. 2a. **d-e** Data from cultured mouse neurosecretory type 1 hypothalamus neurons. **d** Peak current densities of pH6.6-induced current at the indicated time,  $n=8-11$  cells. **e** Number of pH6.6-induced APs at the indicated time,  $n=7-11$  cells. Error bars indicate SEM. For statistical analyses of current densities (**a**, **b**,

**d)**, log2-transformed data were compared by one-way ANOVA test and Dunnett's *post-hoc* test. In **e**, non-transformed data were compared with Kruskal-Wallis and Dunn's post-hoc test; #,  $p<0.05$ ; ##,  $p<0.01$ ; ####,  $p<0.0001$ .

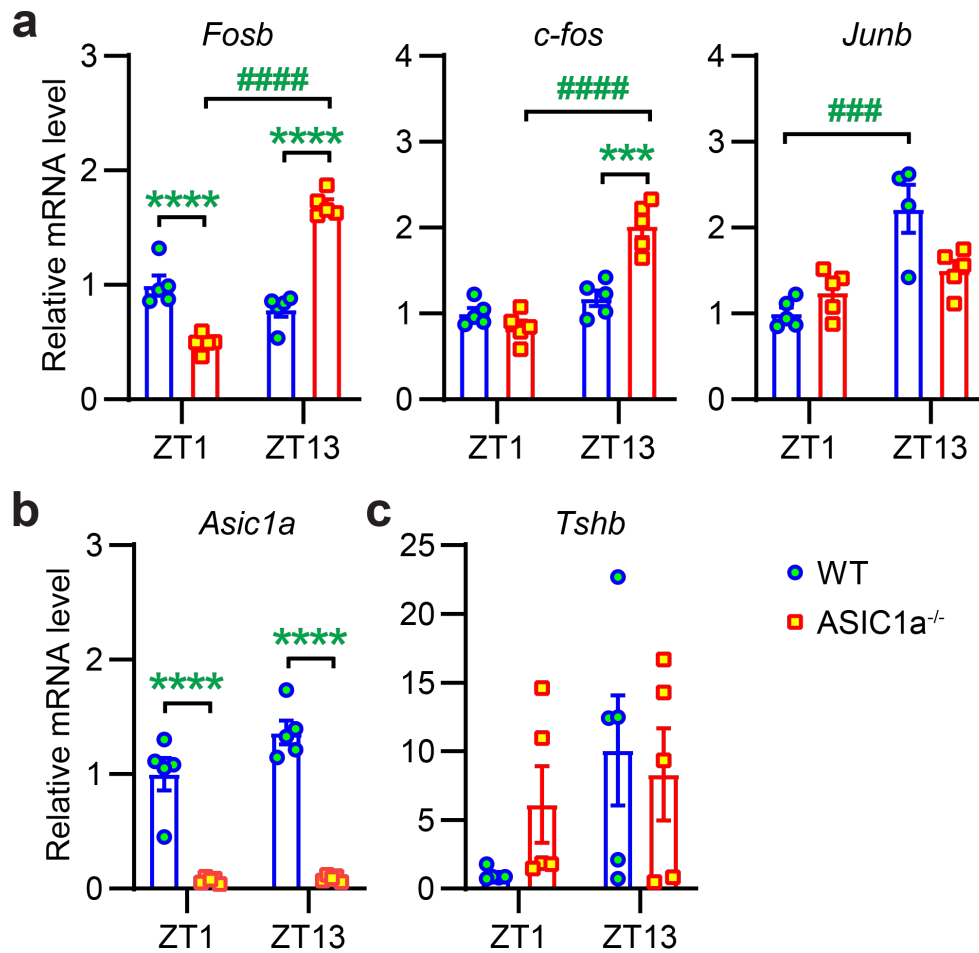

**Supplementary Figure 3. Daily expression pattern of hypothalamic genes.** a-d RT-qPCR analysis to identify the gene expression change of early response genes (a), *Asic1a* (b), and *thyroid-stimulating hormone  $\beta$  subunit* (*Tshb*, c). Results for each mouse are presented as relative expression normalized to the mean of the WT at ZT1 group. Data are presented as mean  $\pm$  SEM,  $n=4-5$  animals per condition. \*\*\*,  $p<0.001$ ; \*\*\*\*,  $p<0.0001$ ; compared WT to corresponding ZT ASIC1a<sup>-/-</sup>; ###,  $p<0.001$ ; ####,  $p<0.0001$ ; comparison of each ZT with the corresponding genotype; two-way ANOVA test and Holm-Sidak's *post-hoc* test. Statistical analysis was done from log2-transformed data.

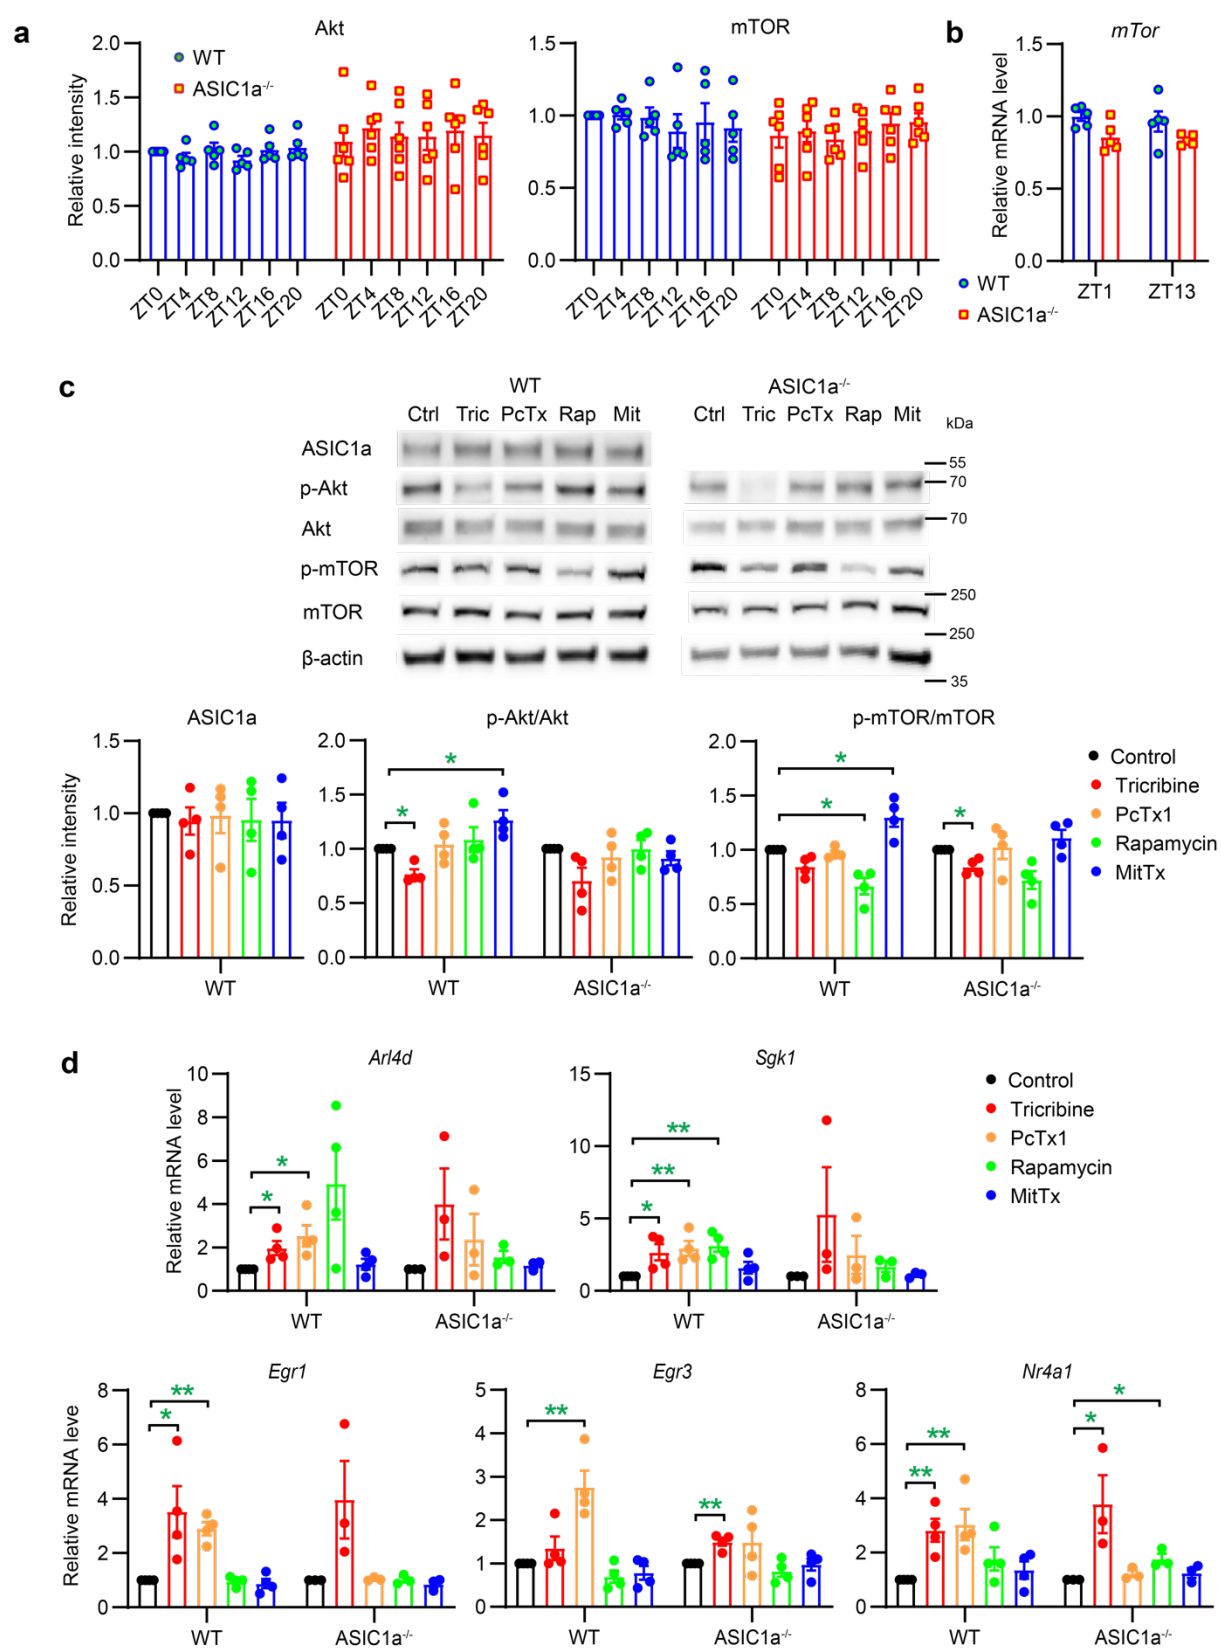

**Supplementary Figure 4. Regulation of the Akt-mTOR pathway.** **a** Quantification of Akt and mTOR expression from the independent experiments of hypothalamus tissue shown in Fig. 5a.  $\beta$ -actin was used as a control for the total protein. The intensity of each protein band is

normalized to the corresponding WT band at ZT0 in each independent experiment;  $n=5-6$  animals per condition. **b** RT-qPCR analysis of *mTor* mRNA. Results for each mouse are presented as relative expression normalized to the mean of the WT at ZT1;  $n=5$  animals per condition. **c** Representative Western blots and quantitative analysis of ASIC1a, Akt, p-Akt, mTOR, p-mTOR and  $\beta$ -actin expression are shown for each protein in WT and ASIC1a<sup>-/-</sup> cultured cortical neurons treated with triciribine (10 $\mu$ M), PcTx1 (10nM), rapamycin (200nM), MitTx (2nM) or vehicle (control) for 2 h, as indicated. For the quantification of ASIC1a expression, p-Akt/Akt ratio and p-mTOR/mTOR ratio, the values measured for each condition are normalized to the corresponding control value in each independent experiment;  $n=4$  independent experiments. \*,  $p<0.05$ ; \*\*,  $p<0.01$ , relative to the control condition in the respective genotype. For p-Akt/Akt in ASIC1a<sup>-/-</sup>, triciribine vs. control,  $p=0.125$ ; for p-mTOR/mTOR, triciribine vs control in WT,  $p=0.056$ ; rapamycin vs. control in ASIC1a<sup>-/-</sup>,  $p=0.066$ . **d** RT-qPCR analysis of *Arl4d*, *Sgk1*, *Egr1*, *Egr3* and *Nr4a1* expression in cultured hypothalamus neurons (from the same samples as those used in **Fig. 5b-d**). Cultured neurons were treated with triciribine, PcTx1, rapamycin, MitTx or vehicle (control) for 2 h, as indicated. Expression levels measured for each condition are presented relative to the mean of the control in the respective experiment;  $n=3-4$  independent experiments. *Egr1*, Triciribine vs. control in ASIC1a<sup>-/-</sup>,  $p=0.07$ . (**c** and **d**) \*,  $p<0.05$ ; \*\*,  $p<0.01$ ; compared with control by one sample t-test. Statistical analysis was done from log2-transformed data. Data are presented as mean  $\pm$  SEM.

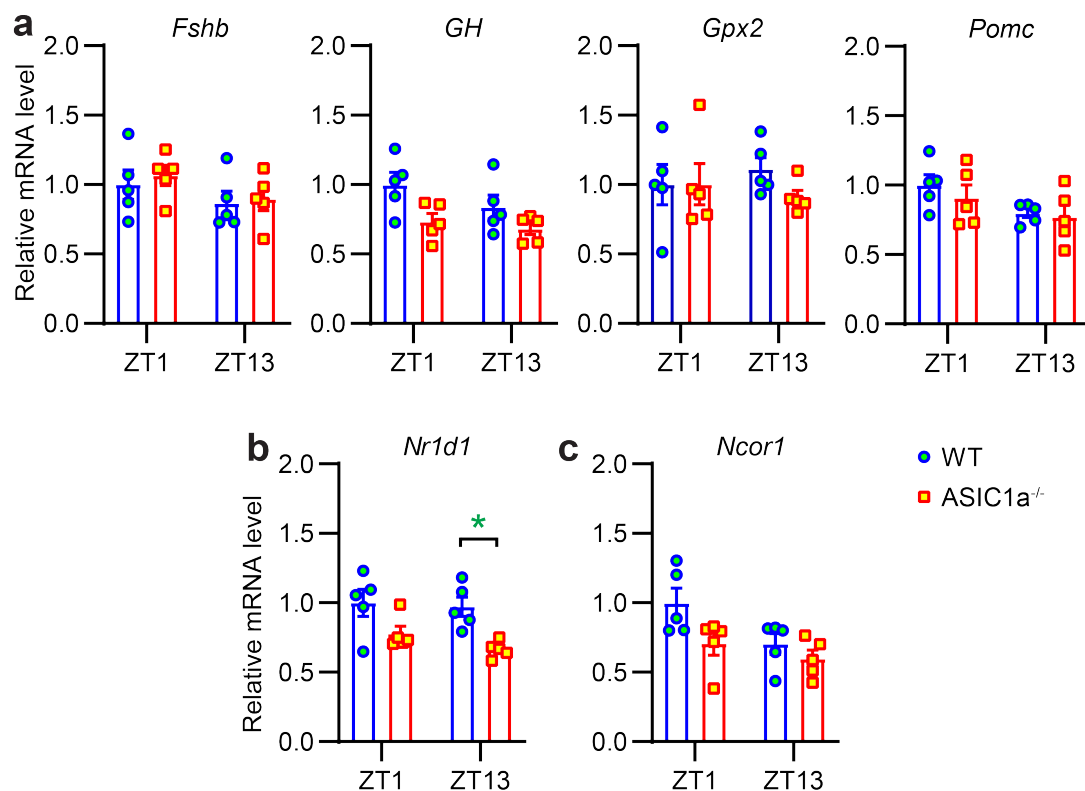

**Supplementary Figure 5. Daily expression pattern of molecules and regulators of the HPT axis.** mRNA levels in the *pars distalis* (PD) of the pituitary were quantified by RT-qPCR. **a** Follicle-stimulating hormone beta subunit (*Fshb*), growth hormone (*GH*), glutathione peroxidase 2 (*Gpx2*), pro-opiomelanocortin (*Pomc*). **b** *Nr1d1* (Rev-Erba); **c** *Ncor1* (Nuclear corepressor 1). Results for each mouse are presented as relative expression normalized to the mean of the WT at ZT1. Data are presented as mean  $\pm$  SEM,  $n=4-5$  animals per condition. \*,  $p<0.05$ ; compared between WT and ASIC1a<sup>-/-</sup> at the same ZT; two-way ANOVA test and Holm-Sidak's *post-hoc* test. Statistical analysis was done from log2-transformed data.



# Supplementary Fig. 6 Uncropped blot images

(Figure 1a)

ASIC1a

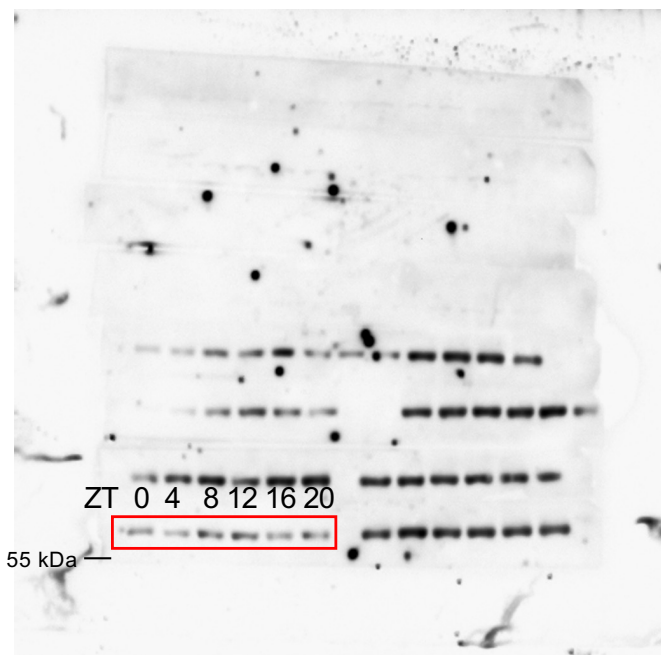

BMAL1

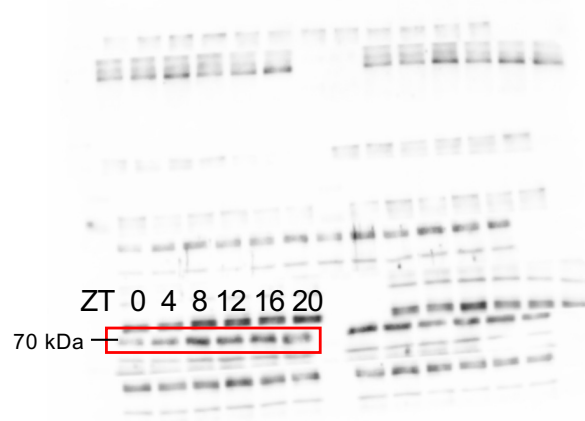

$\beta$ -actin

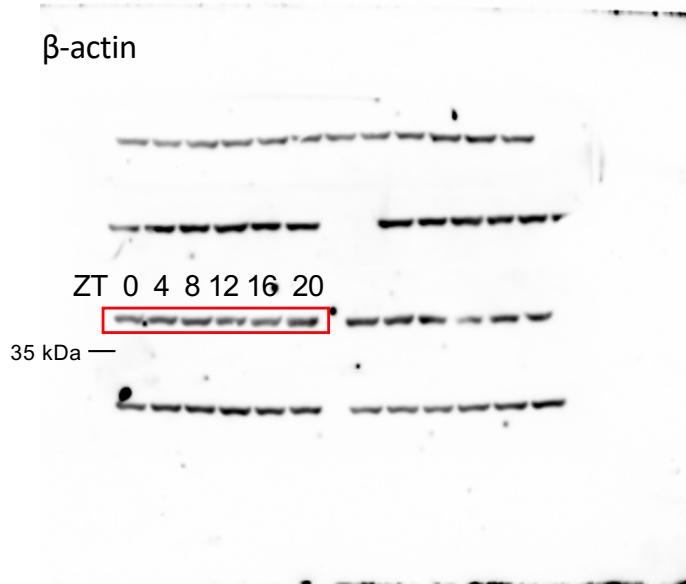

(Figure 1b)

ASIC1a

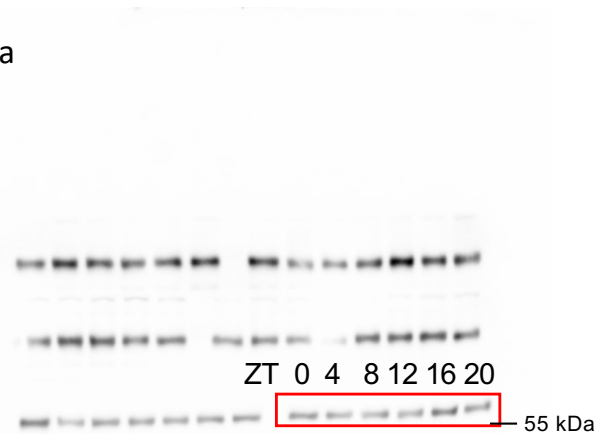

$\beta$ -actin

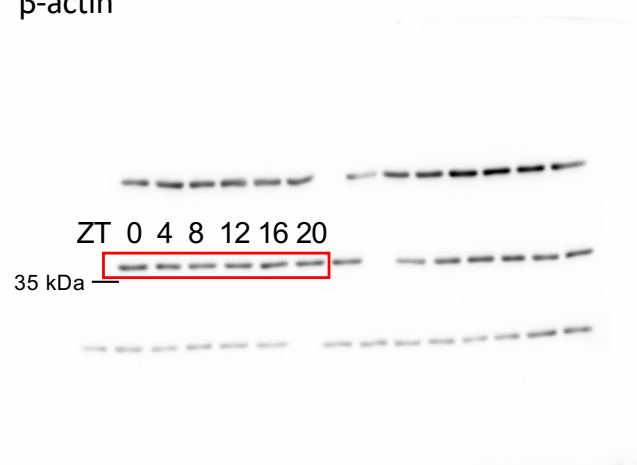

BMAL1

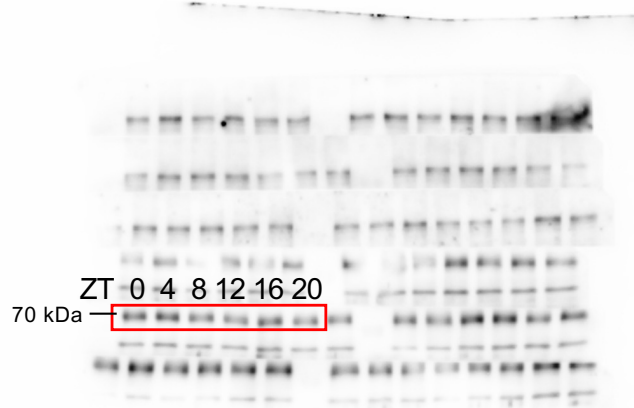

# Supplementary Fig. 6, continued

(Figure 5a)

p-Akt

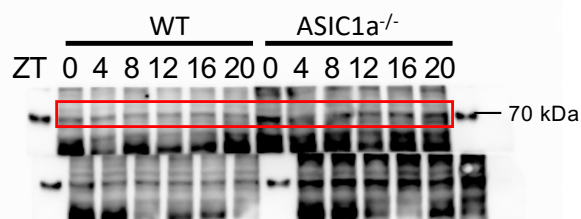

Akt

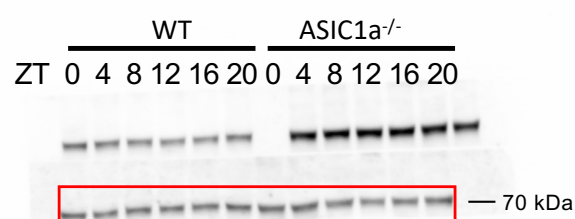

p-mTOR

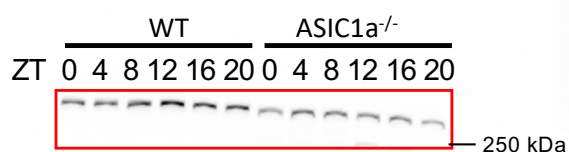

mTOR

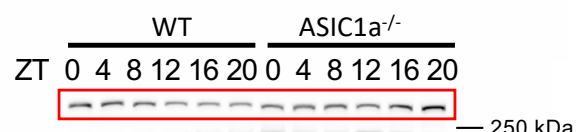

β-actin

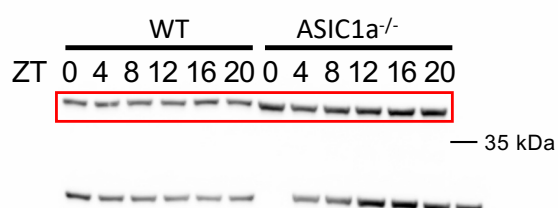

ASIC1a (Supplementary Fig. 1a)

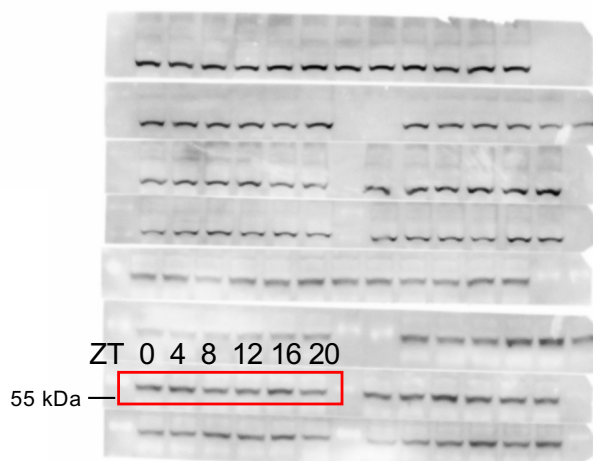

BMAL1

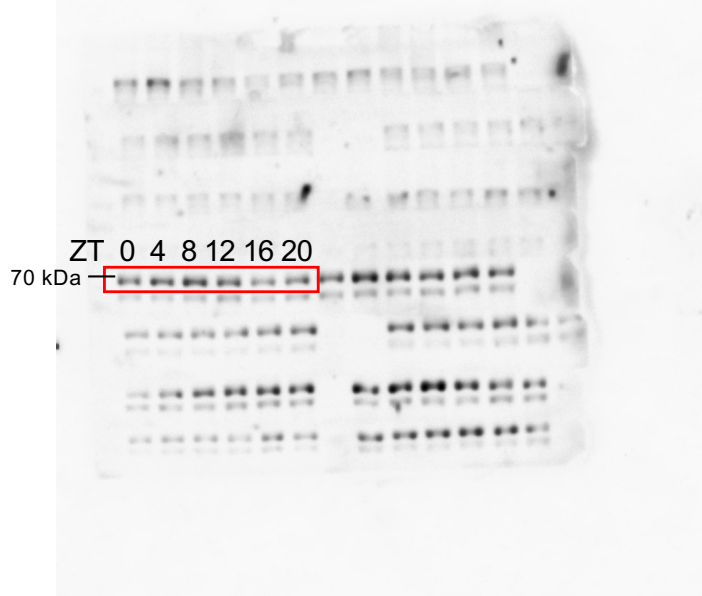

β-actin

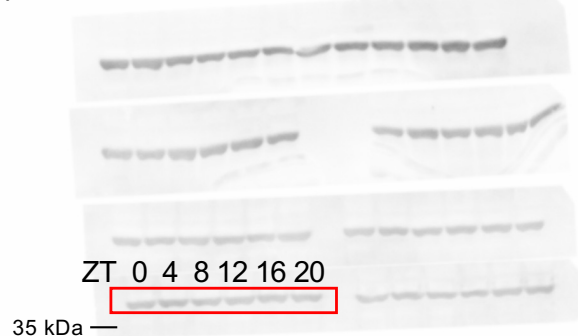

## Supplementary Fig. 6, continued

(Supplementary Figure 1b)

ASIC1a

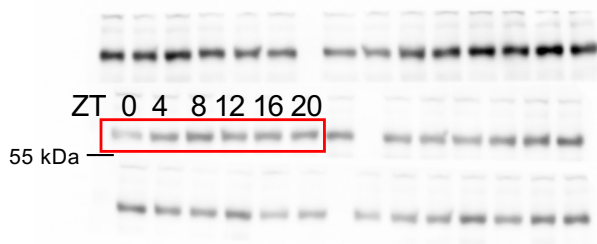

BMAL1

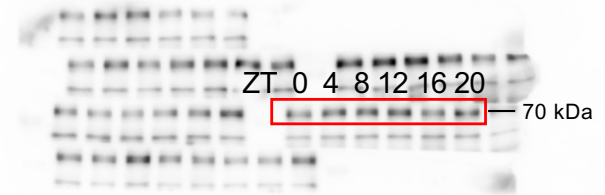

$\beta$ -actin

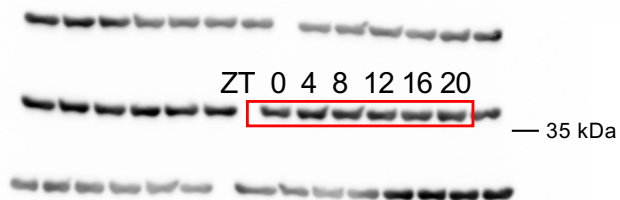

(Supplementary Figure 1c)

BMAL1

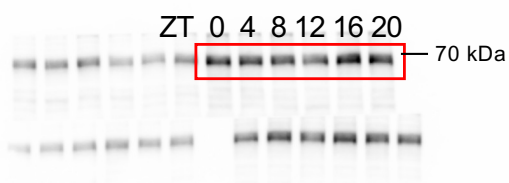

$\beta$ -actin

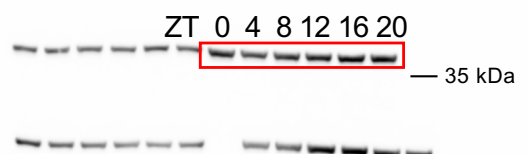

(Supplementary Figure 4c)

ASIC1a (WT)

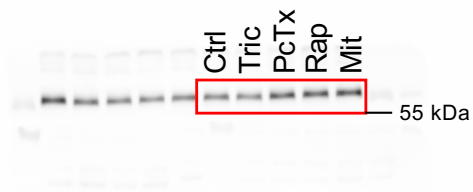

p-Akt (WT)

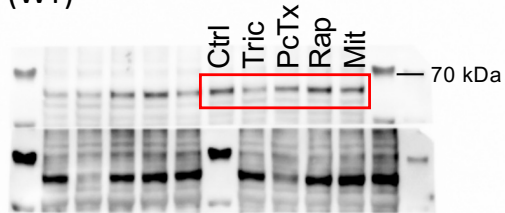

p-Akt (ASIC1a<sup>-/-</sup>)

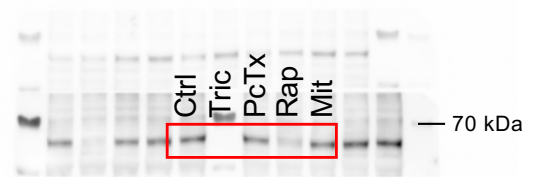

Akt (WT)

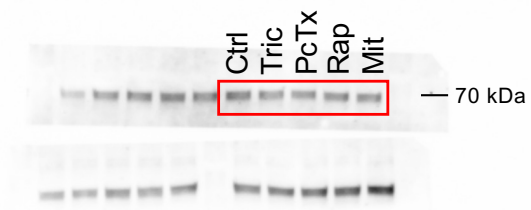

Akt (ASIC1a<sup>-/-</sup>)

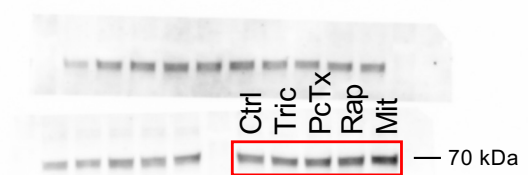

# Supplementary Fig. 6, continued

(Supplementary Figure 4c, continued)

p-mTOR (WT)

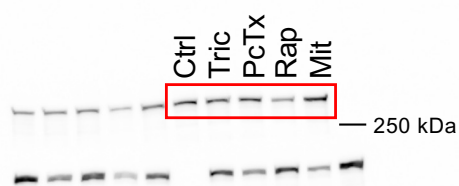

p-mTOR (ASIC1a<sup>-/-</sup>)

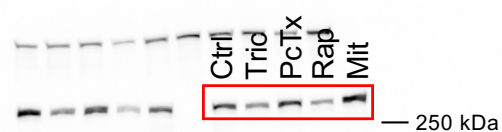

mTOR (WT)

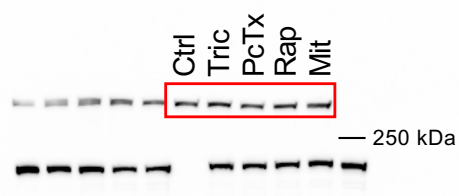

mTOR (ASIC1a<sup>-/-</sup>)

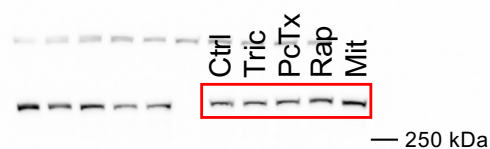

β-actin (WT)

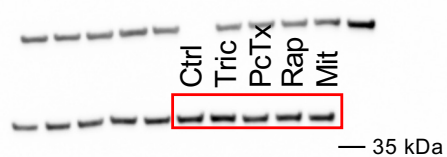

β-actin (ASIC1a<sup>-/-</sup>)

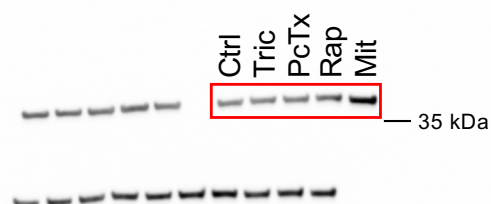

**Supplementary Table 1, Primers for RT-qPCR experiments**

| <b>Gene</b>   | <b>Forward primer</b>        | <b>Reverse primer</b>       |
|---------------|------------------------------|-----------------------------|
| <i>Fshb</i>   | AGGGAGGAAAGGAAAGTGG          | AGCCAGCTTCATCAGCATTT        |
| <i>Gh</i>     | ACGCGCTGCTCAAAAACCTAT        | GCTAGAAGGCACAGCTGCTT        |
| <i>Gpx2</i>   | GTGCTGATTGAGAATGTGGC         | AGGATGCTCGTTCTGCCCA         |
| <i>Prl</i>    | CTCAGGCCATCTTGGAGAAG         | TCGGAGAGAAGTCTGGCAGT        |
| <i>Tshb</i>   | TCAACACCACCATCTGTGCT         | TTGCCACACTTGCAGCTTAC        |
| <i>Asic1a</i> | CCTGCTCAACAACAGGTATG         | CTCGTCCTGACTGTGGATCT        |
| <i>Gapdh</i>  | AACGGGAAGCCCATCACC           | CATACTCAGCACCGGCCTCA        |
| <i>Bmal1</i>  | TGACCCTCATGGAAGGTTAGAA       | GGACATTGCATTGCATGTTGG       |
| <i>Ppia</i>   | AGCACTGGGGAGAAAGGATT         | CATGCCTTCTTTCACCTTCC        |
| <i>Trh</i>    | TCCTGGATCACAAAACGCCA         | CTTGTCTTGGTTGGCACGTC        |
| <i>Cers5</i>  | GACTGCTTCCAAAGCCTTGAG        | GCAGTTGGCACCATTGCTAG        |
| <i>Sgk1</i>   | GGG TGC CAA GGA TGA CTT TA   | CTC GGT AAA CTC GGG ATC AA  |
| <i>Ddit4</i>  | CAAGGCAAGAGCTGCCATAG         | CCGGTACTTAGCGTCAGGG         |
| <i>Btg2</i>   | CCCCCGGTGGCTGCCTCCTATG       | GGGTCGGGTGGCTCCTATCTA       |
| <i>Nr4a1</i>  | TCTGGTCCTCATCACTGATCGA       | AATGCGATTCTGCAGCTCTTC       |
| <i>Nr4a3</i>  | CAGTGTCGGGATGGTTAAGGAA       | CAGACGACCTCTCCTCCCTTT       |
| <i>Arl4d</i>  | GCCTCGAGGGCTGAAGACACCCCAGCTT | CTGAATTCGCCTTGCTGATCCGGTGTA |
| <i>Egr1</i>   | GAACAACCCTATGAGCACCTGAC      | CGAGTCGTTTGGCTGGGATA        |
| <i>Egr2</i>   | TCAATGTCACTGCCGCTGAT         | AGAAATGATCTCTGCAACCAGAA     |
| <i>Egr3</i>   | GATCCACCTCAAGCAAAAGG         | CGGTGTGAAAGGGTGGAAAT        |
| <i>Hprt</i>   | CAGTCCCAGCGTCGTGATTA         | TGGCCTCCCATCTCCTTCAT        |
| <i>TrhR</i>   | CTTCTTAAACCCCATTCCTT         | TTCCTGGAAGATACAGTGCT        |
| <i>c-fos</i>  | CGAAGGGAACGGAATAAGATG        | GCTGCCAAAATAAACTCCAG        |
| <i>Fosb</i>   | ACAGATCGACTTCAGGCGGA         | GTTTGTGGGCCACCAGGAC         |
| <i>Junb</i>   | ATCCTGCTGGGAGCGGGGAAGT       | AGAGTCGTCGTGATAGAAAGGC      |

|              |                                     |                                     |
|--------------|-------------------------------------|-------------------------------------|
| <i>mTor</i>  | ATT CAA TCC ATA GCC CCG TC          | TGC ATC ACT CGT TCA TCC TG          |
| <i>Pomc</i>  | CATAGATGTGTGGAGCTGGTG               | CATCTCCGTTGCCAGGAAACAC              |
| <i>TshR</i>  | ATCGCGGATCCGAAGTAGCCCAGAGGGTCCCTTGG | GATCAGAATTCCAAGGCTGTTTGCTTATACTCTTC |
| <i>Ncor1</i> | GAAGCCACAGCAGAAGAACC                | ACGACCATGTTCTACCAGGC                |
| <i>Nr1d1</i> | CTTCATCCTCCTCCTCCTTCTA              | GTAATGTTGCTTGTGCCCTTG               |
| <i>Dio2</i>  | CTTCCTCCTAGATGCCTACAAAC             | GGCATAATTGTTACCTGATTCAGG            |
| <i>Dio3</i>  | CCGCTCTCTGCTGCTTCAC                 | CGGATGCACAAGAAATCTAAAAGC            |
| <i>Hprt</i>  | CAGTCCCAGCGTCGTGATTA                | TGGCCTCCCATCTCCTTCAT                |

---

The sequences of the primers are provided.
