# Supplementary material for: ASIC1a affects hypothalamic signaling and regulates the daily rhythm of body temperature in mice
Source: Springer Nature journal article supplement (doi:10.1038/s42003-023-05221-2), 2023-08-17
Supplement: MOESM3 [file 42003_2023_5221_MOESM3_ESM.pdf › 42003_2023_5221_MOESM3_ESM.pdf]

## **Description of Additional Supplementary Files**

**File name:** Supplementary Data 1

**Description:** All source data behind the graphs in the paper.
