# Supplementary material for: ASIC1a affects hypothalamic signaling and regulates the daily rhythm of body temperature in mice
Source: Commun Biol. 2023 Aug 17;6:857. doi: 10.1038/s42003-023-05221-2 (PMC10435469; doi:10.1038/s42003-023-05221-2)
Supplement: Supplementary file 4 — Supplementary Data 1 [file 42003_2023_5221_MOESM4_ESM.xlsx]

## Sheet: Figure 1
Figure 1a,Hypothalamus	ASIC1a							BMAL1
	ZT0	ZT4	ZT8	ZT12	ZT16	ZT20		ZT0	ZT4	ZT8	ZT12	ZT16	ZT20
	1	1.01926	2.55148	2.45833	3.13256	2.47475		1	2.27703	2.63008	1.91042	1.98037	2.08176
	1	1.71712	2.27875	1.92344	1.61538	1.38753		1	2.51496	1.41163	1.44952	1.16259	1.30724
	1	1.32726	1.38526	1.52402	1.33828	0.895238		1	1.0603	1.4337	1.30941	1.29122	1.42218
	1	1.47245	1.96056	1.48653	1.5441	1.13081		1	1.38131	1.438	1.11882	0.921084	1.42619
	1	1.09705	1.33353	1.63864	2.72785	1.97848		1	1.11299	2.1114	2.45202	2.69462	1.47797
	1	0.617564	1.50517	1.61932	1.13763	0.988136		1	1.07076	1.15988	1.38491	1.10178	0.781788
	1	1.67674	1.42127	1.38247	1.01664	1.4449		1	1.63566	1.27398	1.47907	1.32262	1.11974
					0.876989	0.691361				1.41034		0.69477	0.51169
Figure 1b, SCN	ASIC1a							BMAL1
	ZT0	ZT4	ZT8	ZT12	ZT16	ZT20		ZT0	ZT4	ZT8	ZT12	ZT16	ZT20
	1	0.864885	0.915973	0.747921	0.937804	1.15287		1	1.42373	0.292715	1.12941	0.982853	1.76549
	1	0.304235	0.250517	0.253943	0.294814	0.293392		1	0.234846	0.325736	0.700217	0.542441	0.663458
	1	0.594875	0.927684	0.782837	0.652336	0.762008		1	1.18942	0.898893	0.767124	0.978186	0.693064
	1	0.483256	0.458102	0.492926	0.760448	0.625126		1	0.675094	0.906985	0.991991	0.684388	0.772632
	1	0.642079	0.933501	0.967786	0.858573	0.976972		1	1.07627	0.90759	0.892177	0.987806	1.24533
	1	0.895621	0.619688	0.141652	1.08795	0.875766		1	0.748398	0.548201	0.373307	0.784946	0.744689
			0.619669		0.801528			1		0.625364		1.60423
			0.551693							0.405705
Figure 1c, ASIC1a mRNA	Hypothalamus							SCN
	ZT0	ZT4	ZT8	ZT12	ZT16	ZT20		ZT0	ZT4	ZT8	ZT12	ZT16	ZT20
	0.652102	0.904269	1.3645	1.79812	1.17708	0.791361		0.687154	0.753006	0.860851	0.80836	0.468601	0.959153
	1.00582	0.378703	1.32152	1.31506	1.40645	0.157034		1.73888	0.775911	0.936247	1.25787	0.697652	0.822676
	1.37569	1.51664	1.97351	1.7304	1.8281	0.913672		1.20443	0.71674	0.807406	0.688108	0.64707	0.523955
	1.13322	0.825326	1.15223	0.765683	1.08884	1.13782		0.672838	0.891391	0.642298	0.478145	0.175606	0.594579
	1.48605	1.29036	1.32053	1.35405	1.71978	0.689552		0.696698	0.769231	0.718649	0.621302	0.560221	0.790227
	0.673087	0.714238	1.05167		0.826345	0.427613			0.781638	0.860851	0.614621
	0.674025	0.624564	1.3676		1.5072
Figure 1d, Bmal1 mRNA	Hypothalamus							SCN
	ZT0	ZT4	ZT8	ZT12	ZT16	ZT20		ZT0	ZT4	ZT8	ZT12	ZT16	ZT20
	0.923026	0.853799	0.939509	0.769738	0.800231	1.05571		1	1.13348	0.930757	0.841248	1.18307	1.12061
	0.888413	0.836493	1.1101	0.818362	0.815065	0.896654		1	1.30347	0.961517	0.966907	0.980499	1.11051
	1.09774	1.1134	0.959288	0.759024	0.823306	0.916433		1	1.05254	1.15059	0.890927	0.779723	0.923068
	0.928795	1.08373	0.757376	0.832372	0.743366	0.932916		1	1.05824	0.948931	0.80797	1.1366	0.998877
	1.16202	0.982364	0.814241	0.763145	1.04417	0.932092		1	1.33935	0.906568	1.03812	1.08284	0.979278
		1.11505	0.99555					1	1.13462	0.902289	0.827213	0.767339	0.953304

## Sheet: Figure 2
Figure 2a				Type1	Type2	Type3
	Neurosecretory			9	3	4
	Non-neurosecretory 1			5	11	9
	Non-neurosecretory 2			0	5	0
	Others			2	2	3
Figure 2b	Zeitgeber Time	current density
	0	22.4	17.6	30.9	49.1	46.1	29.2	40.1	51.6	24.2	15.6
	6	54.7	47.5	44.7	126	67.8	71.8	55.8	78.9	58	83.6
	12	180	164	313	170	301	61.3	242	79.5	52.6	134	50.4
	18	5.82	21.3	70.8	92.5	110	51.2	101	42.1	58.3	52.8
Figure 2d	Zeitgeber Time	number of Aps
	0	4	4	10	5	4	4	3	5	5
	6	4	4	2	1	2	2	4	4	3	1
	12	1	1	3	3	2	2	1	3
	18	2	3	0	2	0	2	3	1	1
Figure 2e	Zeitgeber Time	normalized depolarization AUC
	0	0.790476	1.18359	0.914889	1.17641	1.07693	0.867299	0.823855	1.18718	0.979371
	6	0.918075	0.735553	0.715272	1.02565	0.60765	0.903611	1.06641	0.632381	0.705259
	12	0.978056	1.00279	1.52446	1.08188	1.28302	1.08118	1.50413	1.03869	1.06019	1.32631	1.3736
	18	1.32404	0.836448	1.04891	1.3295	1.29162	0.853593	0.97664	0.863809	1.02362	0.936687	0.913625
Figure 2h	WT	Light	3.59667	2.208	1.24	2.83667	7.87667	8.46333	8.71667	2.12333	0.803333	2.77667	3.13333	2.704	5.23	0.383333	3.83333	2.71667	0.463333	3	1.27667	0.693333	7.83333	1.98333	12.4167	2.52333	0.446667	0.723333	0.526667	2.74333
spontaneous		Dark	5.044	4.89667	1.45333	3.72333	34.15	10.3633	13.25	11.2	7.69444	5.05	2.06333	17.0917	11.9355	7.46	53.4867	50.2133	44.1433	37.1667	24.44	40.5133	4.76667	6.74333	10.19	6.38667	11.8267	6.87333	10.98	11.1
firing rate	ASIC1a-/-	Light	4.05667	3.26	2.90625	0.8	3.49	1.78667	2.76667	1.73333	1.24286	8.17	0.636364	7.23333	2.58333	1.74	1.88333	1.05	0.866667	1.00333	1.18	0.98	12.43	1.70333	1.24667	2.97667	8.16667	5.06	0.576667	1.23333	0.9	2.53333	5.50667	3.01333	1.86333
(Hz)		Dark	3.38	4.11667	3.92	2.53333	2.13667	0.933333	46.03	40.5467	1.68461	5.25	10.3833	10.16	7.63667	6.91429	1.98667	9.58333	2.90333	4.13667	0.486667	4.56667	0.63	4.69333	2.86667	2.395	4.25	3.18333	25.8667	0.49

## Sheet:  Figure 3
Figure 3a, body temperature	ZT	ASIC1a-/-											WT
	0.5	36.5823	36.7755	36.7539	36.9191	37.2095	36.5916	36.5904	36.8682	37.5388	36.7475	37.1307	36.3006	36.4789	36.831	37.1377	37.1187	36.7731	36.7728	36.539	37.0045	36.5267
	1.5	35.764	35.5333	35.8921	36.4049	35.7784	35.5256	35.92	36.2698	36.3327	35.9958	35.8933	35.8358	35.3884	35.7574	35.9124	35.2342	35.3028	36.5652	35.6022	35.5312	36.3845
	2.5	35.6659	35.9117	35.8035	35.7827	35.9274	35.568	35.8845	36.1261	36.1698	36.1307	36.3967	35.5982	35.5444	35.9381	35.7981	35.4492	35.5992	36.164	36.2405	35.859	35.8723
	3.5	35.4911	36.033	35.7046	35.7159	35.8148	35.4803	35.6494	36.1609	36.073	36.6615	35.7433	35.433	35.7069	35.768	35.7936	35.3669	35.8426	36.156	35.8477	35.503	35.8832
	4.5	35.3787	35.6146	35.6233	35.2869	35.6896	35.4096	35.6714	36.1528	35.7392	36.352	35.8013	35.652	35.6424	35.8406	36.0033	36.0142	36.0463	35.6835	35.8635	35.9517	35.8768
	5.5	35.2866	35.6686	35.5711	35.3245	35.7118	35.3721	35.6216	35.9081	35.5767	36.565	35.8278	35.6372	35.6084	36.1114	35.372	35.6971	35.8977	35.6878	35.677	35.8663	35.9012
	6.5	35.3705	35.3273	35.6157	35.5401	35.5464	35.4265	35.7712	35.9584	35.6765	36.3287	35.482	35.4088	35.6729	35.6978	35.9065	35.8585	35.2242	35.3873	35.8515	35.385	35.6337
	7.5	35.5397	35.2724	35.631	35.4416	35.5025	35.3981	35.7691	35.9517	35.5625	36.4098	35.7587	35.5109	35.5498	35.817	35.5786	35.5426	35.3174	35.6905	35.8095	35.691	35.9123
	8.5	35.9071	35.3511	35.6255	35.3888	35.5437	35.6176	35.974	36.0671	35.5958	35.7773	35.7948	35.6263	35.7558	36.1296	35.5673	35.9575	35.6065	35.4517	36.0515	35.5808	35.7125
	9.5	35.5804	35.8601	35.6681	35.6579	35.45	35.4303	35.8279	35.722	36.3745	35.1178	35.79	35.6469	35.5846	35.8617	35.6275	35.4234	35.4554	36.284	35.8053	35.7478	36.0207
	10.5	35.3436	35.8428	36.2087	35.4427	35.8591	35.3379	35.8304	35.8482	36.2893	35.7075	36.1472	35.9793	35.5319	36.5148	36.0519	35.7754	36.1117	36.0237	36.209	35.7728	35.9943
	11.5	36.2024	35.8604	36.2711	36.0111	36.0595	35.9651	36.1162	36.4701	36.262	35.1893	36.2582	36.1885	35.8443	36.2051	36.0816	36.2134	36.4092	36.8695	36.5502	36.1003	36.3428
	12.5	37.0074	37.3005	37.3573	37.4615	37.6551	37.4013	37.5448	37.3338	37.8405	35.9718	36.9625	37.3112	37.0023	37.7216	37.6202	37.787	37.9648	37.3543	37.6695	37.3357	37.607
	13.5	37.5721	37.6062	37.6884	37.8614	38.1154	37.444	38.0913	37.7314	38.0282	37.0335	38.154	37.7227	37.1531	37.9725	37.8294	38.0416	38.1302	37.358	38.1557	37.9798	37.7375
	14.5	37.4443	37.4755	37.9079	37.8067	38.1582	37.4979	37.7926	37.7158	37.868	37.3135	37.8933	37.4298	37.3812	37.5857	37.8262	38.3294	37.6999	37.534	37.8125	37.5695	37.7145
	15.5	37.5897	37.7592	37.9431	37.7681	37.9136	37.4647	37.7109	37.65	37.3728	37.5502	37.7752	37.6294	37.561	37.4499	37.7562	38.3851	37.6773	37.6845	38.0883	37.8957	37.8195
	16.5	37.6808	37.363	37.7214	37.5843	38.1274	37.5227	38.0237	37.6969	37.1608	37.217	38.01	37.9008	37.5926	38.0329	38.2836	38.3218	37.9061	38.022	38.2677	37.718	38.0365
	17.5	37.3707	37.9606	37.3879	37.748	37.7338	37.3968	37.1391	37.0645	37.3738	36.8225	37.6052	37.894	37.7221	38.1033	38.0937	37.6109	37.8757	37.576	38.2945	38.042	38.0943
	18.5	37.0538	37.3457	36.9238	36.9793	36.8837	37.4854	36.4075	36.5616	38.048	37.2195	37.0752	37.6578	37.2879	38.4831	37.2794	37.0404	38.0063	37.454	37.9405	38.0727	37.941
	19.5	37.0213	36.5084	36.9436	37.2227	37.6461	37.2897	36.6738	37.0583	37.0827	37.457	37.6905	37.1166	37.2225	37.4939	37.104	37.7044	37.7599	37.7632	36.563	37.3447	37.5067
	20.5	36.721	36.6251	37.167	37.0245	37.2757	37.0048	36.3759	37.322	37.0425	37.0973	36.9975	37.2304	37.2759	36.6278	37.6419	37.2527	36.5407	37.2398	36.953	37.2157	37.3377
	21.5	36.876	36.6649	37.0619	37.1906	38.0356	37.3613	37.4421	37.0185	37.0285	36.594	37.3525	37.5881	37.3411	37.6178	37.1784	37.5961	37.1614	37.2392	37.0742	37.6183	37.5123
	22.5	37.4842	37.1954	37.63	37.4571	38.0705	37.6868	37.6208	37.3229	37.6482	36.2433	37.6187	37.9528	37.522	37.5374	38.0518	37.4561	37.6182	37.8245	36.861	37.39	37.4763
	23.5	37.5949	37.5346	37.9085	37.6622	38.187	37.5949	37.8347	37.6063	38.0048	36.5995	37.9395	37.7522	37.6741	38.0727	37.8418	37.9141	37.3037	37.223	36.731	37.7028	37.4087
Figure 3b, activity	ZT	ASIC1a-/-											WT
	0.5	0.010452	0.019185	0.013792	0.033089	0.022361	0.02	0.005694	0.011667	0.124875	0.06245	0.05745	0.005835	0.008475	0.003201	0.056528	0.016528	0.028056	0.015	0.026125	0.06675	0.053625
	1.5	0.001111	0.002222	0.005972	0.0175	0.001806	0.002222	0.005694	0.005278	0.00955	0.007275	0.011525	0.001389	0.0075	0.000972	0.017917	0.002917	0.002361	0.000972	0.020725	0.007525	0.0373
	2.5	0.000833	0.002639	0.008611	0.000278	0.002361	0.001806	0.009028	0.003889	0.0082	0.040525	0.04115	0.001528	0.00125	0.001528	0.021389	0.00125	0.002917	0.004444	0.0111	0.025475	0.012725
	3.5	0.001528	0.005	0.004167	0.010139	0.002639	0.005694	0.002917	0.005	0.00725	0.113425	0.018875	0.003333	0.003333	0.001528	0.008056	0.008194	0.002778	0.009722	0.029675	0.00765	0.01515
	4.5	0.002917	0.003611	0.00125	0	0.002778	0.006389	0.010833	0.004583	0.01195	0.12745	0.01495	0.00125	0.017639	0.000833	0.023611	0.004167	0.019861	0.01	0.008275	0.05445	0.030925
	5.5	0.000972	0.010833	0.001389	0.000556	0.001667	0.0025	0.006528	0.0025	0.0069	0.08905	0.0266	0.007778	0.007778	0.00375	0.03125	0.006667	0.008472	0.006667	0.020925	0.0146	0.027525
	6.5	0.008889	0.01625	0.00625	0.014583	0.004583	0.002083	0.016389	0.003056	0.020475	0.0457	0.008925	0.00875	0.00375	0.001389	0.007361	0.011667	0.009444	0.000833	0.013	0.03335	0.015775
	7.5	0.015694	0.001944	0.002639	0.009861	0.000972	0.003611	0.015139	0.005972	0.0084	0.0962	0.020625	0.004583	0.011667	0.007222	0.018889	0.009028	0.013611	0.003472	0.013075	0.0222	0.03245
	8.5	0.022222	0.001528	0.019444	0.006806	0.003472	0.00375	0.0125	0.014861	0.024325	0.030075	0.019525	0.009444	0.01	0.005556	0.058194	0.0025	0.017222	0.006111	0.011625	0.03695	0.024525
	9.5	0.001111	0.007639	0.00125	0.011389	0.005139	0.009028	0.013056	0.00375	0.1164	0.006625	0.0168	0.009306	0.007222	0.002639	0.036111	0.007778	0.005139	0.004167	0.035425	0.017775	0.02455
	10.5	0.00125	0.008611	0.078611	0.006806	0.014722	0.00375	0.022639	0.011944	0.054525	0.0359	0.02335	0.010139	0.016944	0.005417	0.062778	0.006944	0.011111	0.003611	0.030525	0.0585	0.03145
	11.5	0.047361	0.011806	0.027222	0.007222	0.015139	0.014722	0.022361	0.029722	0.045975	0.010975	0.01905	0.015139	0.01625	0.004583	0.026528	0.009306	0.008056	0.025833	0.04475	0.0405	0.04975
	12.5	0.050556	0.049444	0.097778	0.165	0.152083	0.119306	0.132778	0.15375	0.31835	0.0433	0.21175	0.025694	0.07125	0.049167	0.15375	0.124722	0.165694	0.180833	0.152025	0.263425	0.29275
	13.5	0.023889	0.050972	0.116806	0.170556	0.112083	0.098056	0.101111	0.191806	0.276625	0.074525	0.248675	0.028611	0.064306	0.054306	0.133333	0.104444	0.081667	0.175694	0.080225	0.23625	0.2403
	14.5	0.038472	0.054028	0.119028	0.147222	0.105	0.083333	0.084444	0.189722	0.353875	0.144675	0.2085	0.018333	0.029583	0.074722	0.088611	0.100972	0.146944	0.151389	0.159	0.156225	0.217325
	15.5	0.040556	0.056389	0.117083	0.2025	0.092639	0.074167	0.072917	0.18125	0.157675	0.1712	0.187125	0.030694	0.081389	0.081667	0.070278	0.070278	0.142639	0.079306	0.10285	0.191725	0.175025
	16.5	0.057639	0.03125	0.086528	0.161944	0.14125	0.102639	0.108611	0.189028	0.098275	0.0875	0.2323	0.021111	0.108889	0.053194	0.087917	0.168056	0.147639	0.15	0.204125	0.204525	0.23515
	17.5	0.025972	0.0825	0.061944	0.118056	0.080556	0.085694	0.042778	0.080833	0.1904	0.04175	0.157875	0.052639	0.110556	0.115694	0.104444	0.111806	0.042778	0.109306	0.076825	0.22365	0.22475
	18.5	0.0225	0.043611	0.060556	0.062083	0.01875	0.132361	0.012083	0.025139	0.2791	0.085625	0.09975	0.039722	0.064722	0.056806	0.173472	0.02875	0.034167	0.115	0.1243	0.23775	0.2072
	19.5	0.015972	0.010278	0.025278	0.089722	0.056528	0.0525	0.045139	0.073333	0.08355	0.155275	0.1465	0.016389	0.039444	0.070139	0.082917	0.070417	0.08125	0.088194	0.1089	0.0716	0.1562
	20.5	0.012222	0.010694	0.035278	0.090139	0.068611	0.039444	0.021806	0.083889	0.106625	0.06935	0.056275	0.014167	0.05375	0.040278	0.030972	0.061944	0.029306	0.0175	0.056325	0.1264	0.156975
	21.5	0.015417	0.009583	0.067917	0.055278	0.077639	0.066528	0.070833	0.047778	0.08735	0.063625	0.098925	0.014444	0.068889	0.068472	0.086528	0.037778	0.061667	0.061111	0.067325	0.156275	0.142175
	22.5	0.048472	0.035972	0.094722	0.124861	0.080694	0.082639	0.062083	0.100556	0.182725	0.071975	0.146425	0.047917	0.094306	0.081111	0.085	0.159444	0.068611	0.044306	0.13365	0.1303	0.171
	23.5	0.050139	0.058333	0.123194	0.177778	0.109167	0.08875	0.111944	0.084722	0.325075	0.0726	0.19675	0.040972	0.092083	0.098472	0.138611	0.175139	0.132361	0.064306	0.072025	0.275025	0.147275
Figure 3c, Trh mRNA in hypothalamus, WT	WT
	ZT0	ZT4	ZT8	ZT12	ZT16	ZT20
	0.734111	1.01483	1.06486	1.72306	1.15224	0.770945
	0.76135	0.779148	1.1044	1.48463	0.690645	0.673635
	1.47981	1.26751	1.70138	1.04754	1.03778	0.570944
	1.09109	0.840515	1.07117	1.35063	0.788397	0.648219
	1.49161	1.07194	1.39428	1.17039	1.15333	0.678464
	0.763157	1.06254	1.24481	1.48973	0.831122	0.694202
	0.678876	0.815471	1.3155		0.955757
Figure 3d, Trh mRNA in hypothalamus, ASIC1aKO	ASIC1a-/-
	ZT0	ZT4	ZT8	ZT12	ZT16	ZT20
	0.979277	0.994905	0.848978	0.749305	0.770587	1.30279
	1.15482	0.949286	0.846534	0.964683	1.50683	1.35816
	1.01633	0.915938	0.983412	1.3996	1.05578	1.03965
	1.05163	1.4324	1.06725	1.23985	0.965092	0.985107
	1.14681	1.19039	1.34064	0.728469	0.625156	0.86137
	0.745693	0.928445	0.868674	1.11794	1.18878	1.0856
	0.90544	1.30216	0.701112	0.909152	1.16586
Figure 3e, Trh mRNA in PVH		WT							ASIC1a-/-
	ZT1	0.67324	0.889975	1.23367	1.01399	0.867173	1.08397	1.23798	1.04798	0.708123	0.981233	0.59827	0.729246	0.868867	1.06928
	ZT13	1.52076	1.51576	1.16566	1.8421	1.62432	1.50616	0.941862	0.714866	0.680758	1.00265	0.868877	0.812964	0.658159

## Sheet: Figure 4
Figure 4a	Gene Name	WT								ASIC1a-/-
		ZT1				ZT13				ZT1				ZT13
	Cers5	5.52173	5.64318	5.6226	5.51374	5.56189	5.64425	5.58986	5.5317	5.804	5.79311	5.78909	5.88299	5.83532	5.85665	5.87632	5.80359
	Fosb	0.754755	0.704031	0.905209	0.651712	0.734883	0.52042	1.45163	0.997067	1.0911	0.124314	0.739588	0.989569	2.43138	2.52275	2.28166	2.98586
	Sgk1	4.72779	4.64915	4.47897	4.73465	4.77688	5.26694	4.84204	5.09159	4.90292	4.67328	4.70579	4.47444	6.116	6.37279	5.51521	5.94387
	Ddit4	4.5103	4.42078	4.35868	4.4729	4.56901	4.54334	4.45593	4.44715	4.4112	4.36832	4.4265	4.34996	4.91993	4.89627	4.89451	4.85549
	Btg2	3.36162	3.19436	3.19497	3.30343	3.57079	3.25788	3.18251	3.42083	3.41719	3.4811	3.37969	3.27682	4.05781	4.04124	4.06233	4.15165
	Fos	2.74883	2.8477	2.99964	2.71193	4.27911	3.33257	3.80524	3.9617	2.91	2.85755	3.2769	2.78163	4.98852	4.85121	5.00854	5.09074
	Nr4a1	3.51406	3.63027	3.39987	3.50526	3.75365	3.45167	3.4158	3.41266	3.51005	3.81591	3.54732	3.64819	4.55957	4.53735	4.7926	4.70269
	Nr4a3	2.83059	2.8177	2.5502	2.41586	3.61271	2.95274	3.51778	3.39617	2.8342	2.83984	2.71392	2.81239	3.99785	3.95637	3.97743	3.99627
	Egr3	1.35703	1.5227	1.21339	1.13333	1.39381	1.4593	1.5137	1.93028	1.67613	1.90369	1.51738	1.50851	2.3503	2.23488	2.11282	2.66396
	Arl4d	1.86665	1.80546	1.77357	1.86648	1.86772	1.86655	1.76409	2.0083	2.1501	1.65646	1.93248	1.58177	3.07051	3.09902	2.29926	3.04244
	Egr2	-0.661473	-1.17118	-0.98549	-1.37672	-0.775893	-2.26063	-1.05803	-1.88173	-1.07949	-0.625845	-1.26174	-1.37708	0.869786	1.14234	0.739992	1.1496
	Egr1	4.41158	4.60943	4.46739	4.37735	4.84295	4.6842	5.00759	4.89875	4.53053	4.74001	4.63135	4.71323	6.14694	6.07099	5.95475	6.28284
	Junb	2.24248	2.3658	2.40387	2.63827	3.11137	2.73682	2.972	2.97555	2.41315	2.87503	2.56918	2.66511	3.51189	3.74627	3.82785	4.0674
	1700016P03Rik	0.339479	0.595075	0.858655	0.281253	1.31135	1.06492	0.300898	1.18157	0.0909131	0.52962	0.253984	1.11332	2.20107	2.38598	2.17133	2.11147
	Asic1	6.78809	6.84664	6.82723	6.84035	6.79861	6.7713	6.73294	6.7392	6.20908	6.27755	6.17703	6.2944	6.32033	6.32815	6.28733	6.30403
	Krt90	2.30542	2.31518	2.47504	2.47091	2.85028	2.49814	2.67877	2.6605	1.02969	1.55884	1.01977	1.31585	1.96005	1.33865	1.72728	1.43734
	Prl	-0.966776	-2.27188	-0.214472	-2.49367	0.832724	0.52042	0.850516	3.29307	-0.271766	-0.915427	1.39183	-0.0767823	-2.50067	-4.20924	-2.26317	-0.472647
	Gm49980	0.754755	1.49264	2.20425	1.92397	2.84443	2.57253	2.39523	2.38772	1.98736	2.4464	1.96591	1.624	1.35857	1.54852	0.660532	1.24034
Figures 4c-4e, mRNA level
Figure 4c			WT					ASIC1a-/-
	Prl	ZT1	0.192353	0.836717	2.69444	0.346488	0.930005	1.58228	3.97046	0.734443	1.51016
		ZT13	16.037	20.3982	1.95449	2.1709	3.13142	0.861399	0.921843	0.356372	0.061965	0.122007
	Cers5	ZT1	0.7941	0.881381	1.68573	0.87808	0.760709	1.03331	0.885245	0.679807	0.881062	1.1078
		ZT13	0.787002	0.844629	0.946245	0.855351	0.848392	0.988149	0.808175	1.19911	1.15729	0.83519
Figure 4d			WT					ASIC1a-/-
	Arl4d	ZT1	0.998924	0.991443	0.683726	1.15422	1.17169	1.02445	1.11438	1.15067	0.997596	1.27424
		ZT13	1.71583	1.50282	1.09322	1.2618	1.11096	2.44857	2.48805	2.01079	3.35366	2.21316
	Ddit4	ZT1	1.08755	1.02375	0.602591	1.19312	1.09298	0.953174	1.15049	1.15355	1.09003	1.08847
		ZT13	1.49786	1.25184	1.03769	1.1982	1.26218	1.47904	1.55225	1.4785	1.58872	1.29465
	Sgk1	ZT1	0.874388	0.731562	1.71488	0.799067	0.880105	0.753467	0.867202	0.910511	0.849709	0.953407
		ZT13	1.60381	1.41847	1.04384	1.22282	1.13801	1.78597	2.893	1.78767	3.38599	2.01762
Figure 4e			WT					ASIC1a-/-
	Btg2	ZT1	0.948706	1.00058	0.651633	1.26774	1.13134	1.1064	0.975982	1.34067	1.16886	1.04851
		ZT13	1.58926	1.3801	1.05912	1.09585	1.40098	1.65392	1.68855	1.47841	1.53554	1.35553
	Egr1	ZT1	0.95967	0.830583	1.44485	0.831838	0.933062	1.03787	1.06173	1.23058	1.13419	1.03484
		ZT13	1.05714	1.13545	1.30992	1.00085	1.02512	2.59904	2.11425	2.09336	2.10126	2.67626
	Egr2	ZT1	0.84521	0.831529	1.33758	0.996432	0.989252	0.944798	0.977109	0.832685	0.731005	0.651533
		ZT13	0.698647	0.90285	0.779016	0.949316	0.80779	0.710008	0.654002	0.59059	0.635431	0.59504
	Egr3	ZT1	1.17908	1.05821	1.02933	0.971972	0.761405	0.874797	0.981847	1.767	1.09292	0.906788
		ZT13	0.863134	1.05747	1.41118	0.906111	0.968627	1.91006	1.58723	1.85434	1.293	1.90026
	Nr4a1	ZT1	0.928893	0.889331	1.26502	0.985336	0.931415	1.06118	0.942773	1.26385	1.17568	0.954016
		ZT13	1.03697	1.04295	0.976787	0.925266	1.19771	2.17397	2.01833	2.39919	1.86903	2.20263
	Nr4a3	ZT1	0.96819	1.20282	0.595144	1.09225	1.1416	1.21094	1.37834	1.54826	2.26381	1.30463
		ZT13	1.54232	1.65435	1.70104	1.3554	1.72076	2.70702	2.27324	2.1965	2.01432	2.21046

## Sheet: Figure 5
Figure 5a	p-Akt/Akt
	WT						ASIC1a-/-
	ZT0	ZT4	ZT8	ZT12	ZT16	ZT20	ZT0	ZT4	ZT8	ZT12	ZT16	ZT20
	1	0.914568	1.09238	1.14557	1.00158	1.27393	1.98679	1.71176	1.28473	1.67381	1.45836	1.69323
	1	0.703627	1.04096	1.19979	0.948742	0.95509	1.98602	1.15922	1.49017	1.2697	1.39278	1.34312
	1	0.937598	0.825025	1.09228	0.952211	0.995552	1.92207	1.14756	1.07051	1.28121	1.12476	1.19641
	1	0.948769	0.955511	1.08685	0.925268	0.970804	1.04715	0.90119	0.599874	1.06582	1.01085	1.33685
	1	1.1558	0.961649	1.31535	1.53424	1.35297	1.21762	0.950579	0.506709	1.34205	1.17248	1.39072
							1.18674	1.42799	1.02042	1.70358	1.53991	1.32075
	p-mTOR/mTOR
	WT						ASIC1a-/-
	ZT0	ZT4	ZT8	ZT12	ZT16	ZT20	ZT0	ZT4	ZT8	ZT12	ZT16	ZT20
	1	1.5266	1.48138	1.35186	1.16112	1.22982	0.578894	0.501386	1.16732	0.825037	0.449419	0.488233
	1	0.990206	1.09365	1.16577	1.14578	1.25069	0.632932	0.640662	0.82879	0.722487	0.827246	0.539167
	1	0.997941	1.44446	1.88121	1.57981	1.55532	0.631666	0.649012	0.957803	0.723968	0.394406	0.268782
	1	1.49193	1.48017	1.52826	1.73709	1.59606	0.787374	1.02577	0.927244	0.656459	0.7215	0.418443
	1	1.54936	1.69662	1.86556	1.91094	1.53613	0.650246	1.35684	1.21605	0.615425	0.589613	0.614642
							0.667679	0.887258	1.02144	0.756147	0.890865	0.635674
Figure 5b, Trh mRNA	WT					ASIC1a-/-
	Control	Tricribine	PcTx1	Rapamycin	MitTx	Control	Tricribine	PcTx1	Rapamycin	MitTx
	1	0.584794	0.742262	0.967276	2.62442	1	0.507331	0.770571	0.592546	0.774319
	1	0.371927	0.82648	0.423623	2.03426	1	0.437089	0.717972	0.361233	1.15509
	1	0.775022	0.895054	0.585825	3.57278	1	0.729659	1.25721	0.778248	1.03108
	1	0.336166	0.37085	0.251129	1.29706	1	0.757736	1.44444	0.789224	1.19686
	1	0.596393	0.291154	0.472958	1.89758	1	0.835607	0.818806	0.79302	0.906107
	1	0.797007	0.747403	0.848206	1.58978	1	0.767512	0.729828	0.862653	1.12485
Figure 5c, Prl mRNA	WT					ASIC1a-/-
	Control	Tricribine	PcTx1	Rapamycin	MitTx	Control	Tricribine	PcTx1	Rapamycin	MitTx
	1	0.77253	1.21737	0.203899	3.10699	1	0.236703	0.56285	0.056384	1.00201
	1	0.014499	0.784343	0.19735	2.75109	1	0.625894	0.204044	0.543646	0.122757
	1	0.083397	0.102878	0.093268	7.53488	1	0.152826	0.178598	0.18292	0.854183
	1	0.645697	0.000891	0.005748	4.33178
Figure 5d, Trh mRNA	MitTx	+BAPTA-am	+KG-501	+Triciribine	+PcTx1	+Rapamycin
	1	0.882204	0.673272	0.553472	0.403593	0.64861
	1	0.919146	0.964872	0.92874	0.868642	0.873085
	1	0.517489	0.486882	0.877759	0.685701	0.681394
	1	0.676687	0.376291	0.427903	0.767183	0.381137
	1	0.765617	0.745948	0.650741	0.577512	0.640569
	1	0.622051	0.547294	0.598263	0.49726	0.361908
	1	0.379789	0.353434	0.165653	0.25409	0.307203

## Sheet: Figure 6
Figure 6b, wheel running	ZT	ASIC1a-/-											WT
	1	8.50333	8.45	32.4483	5.965	9.875	24.6283	3.39833	29.7867	0.945	1.46333	29.9183	4.08667	15.2783	0.133333	1.4	14.8717	0.553333	0.0516667	21.6167	34.7267	2.28667	33.0233
	2	0.746667	0	27.8483	0.0416667	0.00333333	6.07333	0.0283333	17.405	0.00333333	0	18.9217	1.73667	0.983333	0.0716667	0.911667	2.125	1.95667	0.368333	10.075	26.9017	0.01	26.68
	3	0.00833333	0.541667	11.9567	0.116667	1.24667	0.03	0.00333333	3.17	0.0466667	0.483333	3.16	0.0283333	0.00833333	0.925	2.33667	0.42	1.33667	1.41	8.99333	17.0267	0.0283333	2.82
	4	0.973333	0.588333	3.09667	0.128333	4.50667	0.245	0.0666667	0.103333	0.0283333	0.00833333	0.0666667	0.0833333	0.29	3.08667	8.76333	1.58	2.74	0.605	0.933333	4.88333	0.0316667	0.0316667
	5	0.152857	0.0214286	0.0428571	0.0271429	0.61	0.857143	0.09	0.0414286	0	0.162857	0.0271429	0.0142857	0.438571	0.542857	0.75	0.368571	0.407143	0	1.29	0.378571	0.191429	0.142857
	6	0.0283333	0.0166667	0	0.0833333	0	0.00333333	0.46	0.0833333	0.786667	0.0533333	0.0233333	0.448333	0.366667	0.0716667	0.0283333	0	0.37	0	0.198333	0.0133333	0.21	0.201667
	7	0.0133333	0	0.146667	0	0.00833333	0	0.115	0.31	0.168333	0	0.653333	0.09	0.49	0.00333333	0.00333333	0.00333333	0.00833333	0.0366667	1.12833	0.0533333	0.0133333	0.123333
	8	0.536667	0.12	0	0.186667	0.241667	0.0116667	0.146667	0.0216667	0.291667	0.02	1.21167	0.0466667	0	0.115	0.0116667	0.255	0.22	0.0583333	2.54333	1.05	0.106667	0.308333
	9	0.408333	0.141667	1.285	0	0.231667	0.146667	0.00833333	0.00833333	0.0433333	0.075	0.0366667	0.603333	0.108333	0.0533333	0.536667	0.00333333	0.99	0.025	0.556667	0.005	0.0666667	0.0183333
	10	0.03	0.00333333	0.491667	0.02	0.05	0.276667	0.141667	0.46	0.113333	0.14	0.2	0.711667	0.731667	0.168333	0.138333	0.0316667	0	0	0.265	1.41	0.0133333	0.15
	11	0.115	0.00333333	0.015	0.176667	1.53667	0.39	0	1.74667	0.0316667	0	0.03	0.605	0.718333	0.025	0.143333	1.26333	0.313333	0.02	0.12	0.1	0.311667	0.836667
	12	2.48333	3.23	1.185	1.55667	6.93833	1.89667	1.075	6.30667	1.275	0.23	2.76667	5.88667	1.39667	2.895	2.73667	10.8017	4.92167	2.73833	3.45333	1.49167	2.51	4.48667
	13	29.4517	34.2067	18.0083	24.6717	10.2317	27.0017	16.875	30.9183	19.2383	29.9183	13.2617	37.23	22.705	40.8283	35.0317	37.7367	43.2267	28.5217	29.555	14.7717	30.145	22.2567
	14	32.3	28.9133	26.1983	31.7617	21.1217	31.2583	25.9583	22.6783	20.0117	34.1033	23.6583	38.7783	37.0867	38.8967	40.18	37.1867	43.8467	32.0667	36.18	21.8983	41.2733	29.0533
	15	27	32.065	27.7233	36.2733	23.5867	28.4167	24.7217	28.5783	24.0233	33.54	29.1317	39.515	39.5583	41.9133	40.9883	36.06	42.9683	33.89	46.7383	22.2233	42.5983	30.9233
	16	29.8783	33.0783	32.5683	36.265	20.115	31.42	28.635	36.1733	22.54	33.8083	26.6467	42.915	38.3017	42.8817	39.3767	34.94	40.8917	44.6883	46.54	26.9967	44.6817	27.6933
	17	29.755	29.345	33.6717	38.605	20.9383	37.64	30.4917	28.7683	23.56	32.245	34.2433	46.9733	40.8833	40.62	43.41	39.1783	44.2083	43.1817	48.8983	34.36	48.5133	26.7333
	18	29.4433	30.5333	30.55	34.4317	17.9367	38.5267	28.23	30.7083	25.5933	36.0417	36.8117	41.6133	39.7883	41.8167	38.425	34.9733	40.8217	42.08	46.9717	35.9567	42.605	36.8517
	19	21.1717	25.36	22.0783	34.045	15.3117	25.995	28.7567	36.705	19.815	30.06	34.305	40.9683	44.0017	36.4217	30.3833	29.71	27.7517	43.8617	40.7167	31.98	45.4467	28.0333
	20	15.3283	10.23	4.64	24.6633	12.18	10.4283	17.8333	28.08	11.82	23.875	31.9183	36.525	38.0767	22.8033	22.8817	24.6617	21.5333	36.4833	33.5983	25.0717	42.6517	23.0217
	21	13.14	1.73	0.535	25.8717	9.84833	11.9167	14.4917	31.4133	5.57167	9.61333	39.26	35.6217	25.365	24.3733	5.17667	14.015	27.8867	35.645	36.7733	8.89667	33.6867	18.38
	22	15.4567	18.2033	20.9567	21.4983	11.025	13.0683	20.715	36.3533	7.93833	19.78	36.6433	32.0233	37.2017	24.6667	8.12	8.285	24.4883	29.2417	28.8383	5.07	16.175	32.4833
	23	23.4267	22.23	23.2167	24.74	19.96	12.2467	19.6033	37.51	11.06	19.2383	29.8017	24.26	35.6483	25.6783	21.525	13.2117	23.9617	21.7	29.4133	24.5617	19.915	35.5417
	24	29.395	22.4367	28.7317	23.8	20.8883	19.1167	16.355	27.5967	11.6683	16.65	40.2883	18.92	33.1667	15.9233	21.3133	19.9683	15.9567	15.9217	26.8733	30.99	17.8083	36.225
Figure 6c, free-running period	WT	23.86	23.74	23.86	23.89	23.78	23.65	23.78	23.87	23.79	23.76	23.76
	ASIC1a-/-	24.01	23.78	23.79	23.84	23.92	24.03	23.97	23.97	23.89	23.97	23.89	24.01
Figure 6d, phase shift	LP ZT14	WT	-0.89	-1.21	-1.2	-1.36	-2.34	-1.31	-1.38	-0.13	-1.6	-1.19
		ASIC1a-/-	-0.55	-1.26	-0.18	-0.96	-2.26	-1.37	-0.86	-2.29	-0.57	-0.58	-0.95
	LP ZT22	WT	1.28	0.73	0.35	0.78	1.59	2.12	-0.09	1.35	1.53	1.15	0.57
		ASIC1a-/-	0.24	0.15	0.27	1.24	0.81	1.12	1.19	0.67	2.38	0.61	1.71

## Sheet: Figure7
Figure 7a			WT					ASIC1a-/-
	Tshb	ZT1	1.02037	0.86188	0.976344	1.1655	0.735962	0.936576	0.778239	0.729239	0.745562	0.745735
		ZT13	1.25352	1.61064	1.78127	1.49813	1.60087	0.45939	0.671195	0.554419	0.650456	0.533032
Figure 7b	TSH in PD		WT									ASIC1a-/-
		ZT5	121502	111486	100747	104068	113083	123622	98996.8	106036	99840.1	99846.2	116313	87285.9	85701.7	107072	109083	102467	110420
		ZT17	96811.4	78433.2	107653	84754	94936.3	89680.4				117327	156343	129083	81143.6	99338.8	78414.8	101869	134611	92985.6
Figure 7c	Prl		WT					ASIC1a-/-
		ZT1	1.05446	1.19834	0.960583	1.05321	0.733411	0.804715	0.916788	0.956409	0.676372	0.800986
		ZT13	0.725747	0.779401	0.730929	0.793913	0.699876	0.637922	0.833275	0.782782	0.883525	0.809872
Figure 7d			WT									ASIC1a-/-
	TSH	ZT1	17	33	15	51	28	27	36	30	32	17	30	31	14	20	32	19	20
		ZT5	35.277	26.2775	50.7895	49.2239	11.3614	32.9362	17.9904			51.4809	23.0272	18.783	25.6412	18.7741	26.5672	28.624
		ZT13	14	15	30	23	16	10	10	14		13	21	22	26	12
		ZT17	52.2569	14.5187	16.0531	39.1001	35.8238	26.6451	62.5726	34.4851		55.5457	30.3331	17.0748	43.9092	13.0936	22.8826	27.6978
	T3	ZT1	82.1	96	76.1	97.9	95.5	72.1	86.2	88.1	51.9	82.1	66.4	77.5	56.3	73.4	88.1	74	65.5	72.6
		ZT5	54.6948	45.473	65.5066	66.1425	67.7325	93.1719	78.2263	99.2138	74.7283	58.1927	80.4522	84.9041	65.8245	84.5861	76.3183	74.0924	73.1384	79.8162
		ZT13	76.7	57.4	73.2	65.5	50.6	46.5	48.4	44.3	60.9	60.6	68.8	55.5	72.9	58.5	54.1	66.9	72.6	60.6
		ZT17	75.3643	57.2387	51.8329	68.0505	54.6948	55.6488	42.611	55.6488	55.9668	70.2764	60.1007	54.0588	58.8287	47.3809	67.4145	67.7325	71.5484	70.9124
	T4	ZT1	4.48	3.96	4.01	4	3.6	4.46	4.8	4.85	3.88	4.95	3.92	4.45	3.34	4.42	4.21	4.07	4.45	4.25
		ZT5	3.11	3.14	4.35	3.49	4.36	3.37	3.14	3.83	4.54	3.44	5.22	4.01	3.76	4.32	4.13	4.23	3.39	5.1
		ZT13	3.37	3.01	3.44	3.96	2.64	2.49	2.14	1.93	3.51	3.82	3.74	2.9	3.44	2.99	3.51	2.9	4.46	2.02
		ZT17	2.62	2.97	2.47	3.63	2.86	2.8	2.65	2.59	3.39	3.69	3.27	1.96	3.09	2.41	1.65	3.35	2.65	2.99
Figure 7e	TSH in PT		WT										ASIC1a-/-
		ZT5	16.8468	22.4225	142.58	39.5695	12.3064	94.37	7.76444	5.42212	31.9527	23.3153	28.5073	32.6136	190.798	50.218	213.948	21.266	222.615	101.366	8.4134
		ZT17	4.70491	5.45063	4.89901	6.66403	7.85958	5.22337	67.85	64.94	23.7825		111.178	130.141	8.26	262.483	499.65	5.35	88.2003	123.357	148.509
Figure 7f	Tshb in PT		WT							ASIC1a-/-
		ZT1	0.190424	0.101837	2.27216	2.75121	1.02205	0.566595	0.09573	0.123375	0.061902	0.116826	0.87024	0.092448	0.050467	0.055087
		ZT13	1.35503	0.145732	1.42402	0.111174	0.095268	0.049097		0.062998	1.55009	1.34286	1.4105	1.42211	0.100182	0.068084
Figure 7g			WT							ASIC1a-/-
	Dio2 in MBH	ZT1	0.619747	0.997267	0.66637	1.44989	1.28413	0.947084	1.03551	0.976554	0.834429	0.729	0.604913	0.908987	0.456227	0.614321
		ZT13	0.863956	0.851183	0.924655	0.612578	0.461129	0.350733		0.543054	0.961466	0.932452	0.642602	0.745441	0.418035	0.435716
	Dio3 in MBH	ZT1	3.76212	0.23539	0.693638	0.60935	0.623896	0.615757	0.459853	0.325708	0.418273	0.473239	0.304053	0.321533	0.499909	0.350141
		ZT13	0.787396	0.343061	0.612679	0.621332	0.241529	0.460326		0.478449	0.667065	0.559143	0.576819	0.563312	0.571178	0.303928

## Sheet: Supplementary Figure 1
Supplementary Figure 1a WT hippocampus	ASIC1a							BMAL1
	ZT0	ZT4	ZT8	ZT12	ZT16	ZT20		ZT0	ZT4	ZT8	ZT12	ZT16	ZT20
	1	0.876986	0.649572	1.0383	1.11799	1.23086		1	1.27189	1.59604	1.4945	0.854611	1.14034
	1	0.969301	0.83912	0.827828	0.875216	0.873245		1	1.5382	1.28883	1.02982	1.07284	0.893155
	1	0.916236	1.0222	1.09135	1.0181	1.2367		1	1.34965	1.3169	1.30305	1.34149	1.50273
	1	0.754689	0.915947	0.985754	1.00721	0.971095		1	1.40772	1.20821	1.35507	0.730873	0.647542
	1	0.971337	0.838391	0.773341	0.990768	0.823861		1	1.07858	1.51287	1.63356	1.85668	1.74502
	1	0.901834	1.08811	0.992953	0.934261	0.974407		1	1.12547	1.3951	1.05187	0.860939	0.774357
	1	1.01155	1.48328	1.47503	1.3359	1.07959		1	1.32318	1.55803	1.35751	1.52252	1.56715
	1	0.971251	1.3165		1.2114	1.11432		1	1.1279	1.34976		1.17214	0.644564
Supplementary Figure 1b WT hypothalamus without SCN	ASIC1a							BMAL1
	ZT0	ZT4	ZT8	ZT12	ZT16	ZT20		ZT0	ZT4	ZT8	ZT12	ZT16	ZT20
	1	1.0347	1.01164	1.21781	0.657764	0.809825		1	1.13724	1.21104	1.06339	1.29518	1.37445
	1	1.26698	1.48232	2.26675	1.71863	1.6676		1	1.13424	1.31995	1.46461	1.10128	1.23274
	1	1.53216	1.95886	1.67114	1.76594	1.72368		1	1.5097	1.42425	1.65307	1.81812	1.81213
	1	1.05753	1.0241	1.37466	1.48953	1.59756		1	1.12242	1.15991	0.978646	0.583917	0.654923
	1	0.963982	1.18686	1.13679	0.892592	0.949644		1	1.46845	1.55541	1.07522	0.957684	0.935623
	1	0.979147	1.70426	1.76081	1.49595	1.38022		1	1.15507	2.12555	1.06686	0.813325	0.545221
			1.88439		1.82991			1		1.18991		1.58453
			1.45397							1.26024
Supplementary Figure 1c ASIC1a-KO hypothalamus								ZT0	ZT4	ZT8	ZT12	ZT16	ZT20
								1	1.13348	0.930757	0.841248	1.18307	1.12061
								1	1.30347	0.961517	0.966907	0.980499	1.11051
								1	1.05254	1.15059	0.890927	0.779723	0.923068
								1	1.05824	0.948931	0.80797	1.1366	0.998877
								1	1.33935	0.906568	1.03812	1.08284	0.979278
								1	1.13462	0.902289	0.827213	0.767339	0.953304

## Sheet: Supplementary Figure 2
Supplementary Figure 2a		Time
	Type 1	00:00	185.266	276.843	114.3	94.8	139	118	82.9	173	298	238	55.3	251
		06:00	238.851	196.387	152.936	125	83.6	200	123	143	106	84.5	125	151
		12:00	130.206	176.633	210.275	209	121	101	50.4	94.1	91.8	178	76.3	180
		18:00	167.627	240.775	230.996	173	120	436	379	119	262	165	110
	Type 2	00:00	92.9	99.1	161	97.028	245	74.5	44	130
		06:00	39.3	75.6	62.6	122.562	33.5	49.6	140
		12:00	25.9	42	67.8	49.6401	32.1	21.3	55	43.6
		18:00	47.8	188	154	306	39.2011	113	36.4	230
	Type 3	00:00	228	130	278	174	116	218	92	176
		06:00	150	58.5	54.3	121	166	142	187	113	180
		12:00	174	133	297	264	105
		18:00	141	83.1	144	103	96.8	118
	Type 4	00:00	139.483	47.0384	210.659	254	59.8	212	119	60.6
		06:00	194.617	67.0993	145.515	129	250	198	197	103
		12:00	54.3531	204.709	66.0017	31.6	213	73.3	37	188	91.7
		18:00	197.712	153.635	179	189	123	125	73.4	163
Supplementary Figure 2b	Cortex		57.07	24.7065	37.2	21.9812	28.1	40.9	8.7	23.8992	28.9	14.4	30.3	99.16	33.3	41.3	49.5096	15	16.8	20.3	11.2	11.33	13.809	37.1263	35	22.3	34.5	10.2226	22.8	17	12.9	16.5	32.54	75.0411	13.5	16.9	26.5	35.4	29.1536	14.5	9.15	23	16.3
	Hippocampus		23	4.09	16	23.7	10.6	19.2407	44.4	18	9.78	41.4	25.8	20.2	53.1	31	11	48.1	13.1	64.4	13.6	77.2044	4.76	13.9	42.9	14.7	14.6823	9.51
	Hypothalamus type1		185.266	276.843	114.3	94.8	139	118	82.9	173	298	238	55.3	251	238.851	196.387	152.936	125	83.6	200	123	143	106	84.5	125	151	130.206	176.633	210.275	209	121	101	50.4	94.1	91.8	178	76.3	180	167.627	240.775	230.996	173	120	436	379	119	262	165	110
	Hypothalamus type2		39.3	75.6	62.6	122.562	33.5	49.6	140	25.9	42	67.8	49.6401	32.1	21.3	55	43.6	47.8	188	154	306	39.2011	113	36.4	230	92.9	99.1	161	97.028	245	74.5	44	130
	Hypothalamus type3		228	130	278	174	116	218	92	176	150	58.5	54.3	121	166	142	187	113	180	174	133	297	264	105	141	83.1	144	103	96.8	118
	Hypothalamus type4		139.483	47.0384	210.659	254	59.8	212	119	60.6	194.617	67.0993	145.515	129	250	198	197	103	54.3531	204.709	66.0017	31.6	213	73.3	37	188	91.7	197.712	153.635	179	189	123	125	73.4	163
Supplementary Figure 2d	Time
	00:00	48.4	72.2	107	107	97.4	98.4	71	117	168	104	188
	06:00	135	241	114	23.2	262	71.2	80.3	116	86.2
	12:00	59.2	67.3	82.7	30.2	81.6	80.7	53.6	51.8	175	110	66.3
	18:00	187	248	99.4	129	292	126	237	297
Supplementary Figure 2e	Time
	00:00	4	5	5	3	1	1	2
	06:00	1	3	2	1	2	1	2	1	2	2	1
	12:00	3	2	3	2	4	5	6	4	3	8
	18:00	3	3	4	2	6	2	3	4	4	8

## Sheet: Supplementary Figure 3
Supplementary Figure 3a			WT					ASIC1a-/-
	Fosb	ZT1	1.3193	0.876571	0.956769	0.991308	0.856056	0.50211	0.376511	0.492472	0.497789	0.594277
		ZT13	0.80476	0.85957	0.841894	0.883036	0.535978	1.60744	1.73124	1.8687	1.6288	1.65572
	c-fos	ZT1	1.2209	1.04642	0.87553	0.955932	0.901216	0.585547	0.787612	1.07536	0.907011	0.847025
		ZT13	1.22832	0.927991	1.42051	1.021	1.29597	2.07742	2.22192	2.33222	1.8133	1.64836
	Junb	ZT1	1.11328	0.869535	0.942792	1.22236	0.852034	0.881009	1.41211	1.07549	1.35445	1.51496
		ZT13	2.57248	2.62428	1.41972	2.25934		1.56464	1.74598	1.65661	1.43229	1.11474
Supplementary Figure 3b	ASIC1a		WT					ASIC1a-/-
		ZT1	1.11024	1.0834	0.452969	1.0521	1.30128	0.085364	0.104182	0.038614	0.052014	0.078427
		ZT13	1.73531	1.39777	1.14446	1.32759	1.2147	0.106931	0.071952	0.119692	0.059301	0.089281
Supplementary Figure 3c	Tshb		WT					ASIC1a-/-
		ZT1	0.805326	0.851167	1.78671	0.708601	0.848199	1.85	1.46354	10.9588	1.77386	14.5895
		ZT13	2.08649	12.3986	12.4799	0.719412	22.6784	14.2958	9.32295	16.6823	0.812838	0.485352

[truncated: 2 more sheets: Supplementary Figure 4, Supplementary Figure 5]
